# Supplementary material for: A Spatial Autocorrelation Method for Taenia solium Risk Mapping: The Case of Lao PDR
Source: MDPI journal article supplement (doi:10.3390/tropicalmed8040221), 2023-04-10
Supplement: s1 [file s1]

**Figure S1.** Global Moran's I statistic across five spatial lag orders.

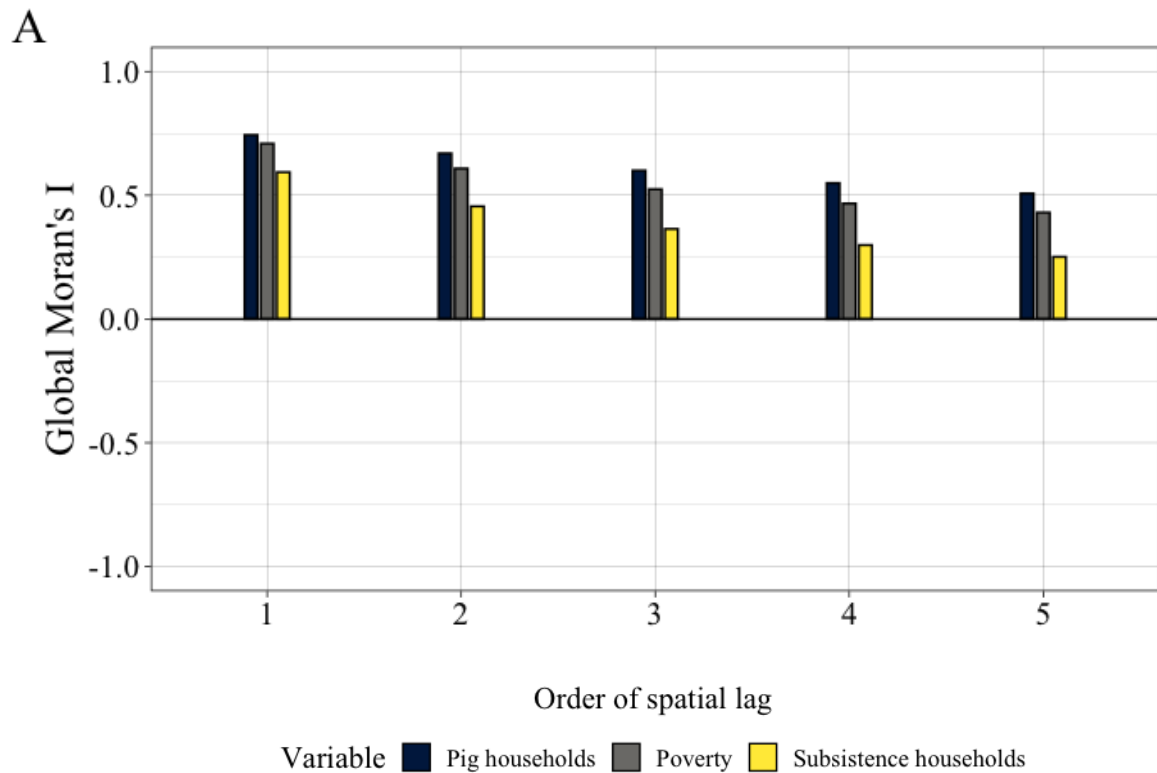

**Table S1.** Global join-count statistics for binary variables

| Risk factor                  | Global join count statistic |        |         |
|------------------------------|-----------------------------|--------|---------|
|                              | Expected                    | Result | p-value |
| Main sanitation type         |                             |        |         |
| <i>Improved-Improved</i>     | 10,641                      | 13,108 | <0.001  |
| <i>Unimproved-Unimproved</i> | 2,899                       | 5,587  | <0.001  |
| Main water source            |                             |        |         |
| <i>Improved-Improved</i>     | 4,837                       | 8,148  | <0.001  |
| <i>Unimproved-Unimproved</i> | 7,647                       | 11,220 | <0.001  |
